# Supplementary figures and images for: Particularities of photocatalysis and formation of reactive oxygen species on insulators and semiconductors: cases of SiO2, TiO2and their composite SiO2–TiO2
Source: Royal Society of Chemistry journal article supplement (doi:10.1039/c8cy00991k), 2018-01-01

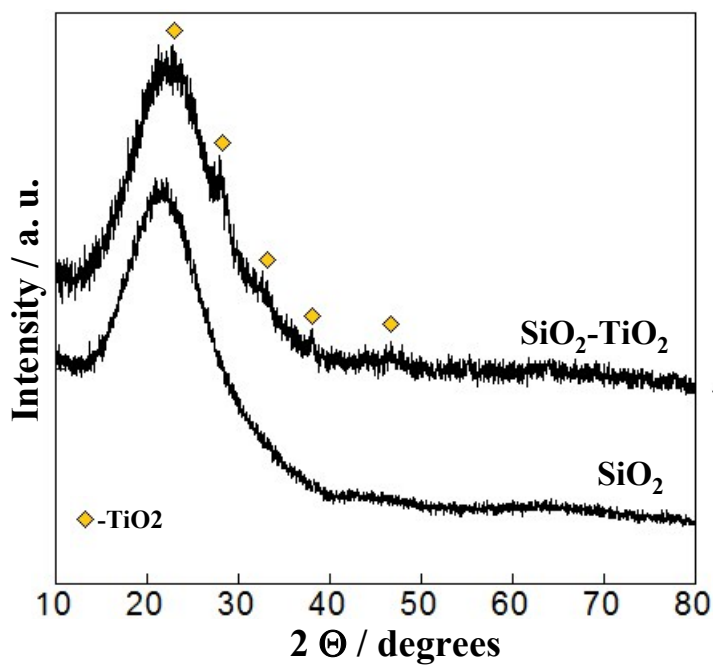

**S1** Comparative XRD pattern of tubular  $\text{SiO}_2$  and of  $\text{SiO}_2\text{-TiO}_2$  composite.

Supplement: c8cy00991k1.pdf [file c8cy00991k1.pdf]
